# Supplementary material for: Data-Driven Prediction of Maximum Settlement in Pipe Piles under Seismic Loads
Source: MDPI journal article supplement (doi:10.3390/jmse12020274), 2024-02-02
Supplement: s1 [file s1]

| Input parameters |         |        |        |                |                  |                    |
|------------------|---------|--------|--------|----------------|------------------|--------------------|
| No               | E (Mpa) | (N1)60 | Dr (%) | Friction angle | $\gamma$ (kN/m3) | Pile end condition |
| 1                | 15      | 10     | 40     | 31             | 17.1             | CE                 |
| 2                | 15      | 10     | 40     | 31             | 17.1             | CE                 |
| 3                | 15      | 10     | 40     | 31             | 17.1             | CE                 |
| 4                | 15      | 10     | 40     | 31             | 17.1             | CE                 |
| 5                | 15      | 10     | 40     | 31             | 17.1             | CE                 |
| 6                | 15      | 10     | 40     | 31             | 17.1             | CE                 |
| 7                | 15      | 10     | 40     | 31             | 17.1             | CE                 |
| 8                | 15      | 10     | 40     | 31             | 17.1             | CE                 |
| 9                | 15      | 10     | 40     | 31             | 17.1             | CE                 |
| 10               | 15      | 10     | 40     | 31             | 17.1             | CE                 |
| 11               | 15      | 10     | 40     | 31             | 17.1             | CE                 |
| 12               | 15      | 10     | 40     | 31             | 17.1             | CE                 |
| 13               | 15      | 10     | 40     | 31             | 17.1             | CE                 |
| 14               | 15      | 10     | 40     | 31             | 17.1             | CE                 |
| 15               | 15      | 10     | 40     | 31             | 17.1             | CE                 |
| 16               | 25      | 15     | 60     | 37             | 18.3             | CE                 |
| 17               | 25      | 15     | 60     | 37             | 18.3             | CE                 |
| 18               | 25      | 15     | 60     | 37             | 18.3             | CE                 |
| 19               | 25      | 15     | 60     | 37             | 18.3             | CE                 |
| 20               | 25      | 15     | 60     | 37             | 18.3             | CE                 |
| 21               | 25      | 15     | 60     | 37             | 18.3             | CE                 |
| 22               | 25      | 15     | 60     | 37             | 18.3             | CE                 |
| 23               | 25      | 15     | 60     | 37             | 18.3             | CE                 |
| 24               | 25      | 15     | 60     | 37             | 18.3             | CE                 |
| 25               | 25      | 15     | 60     | 37             | 18.3             | CE                 |
| 26               | 25      | 15     | 60     | 37             | 18.3             | CE                 |
| 27               | 25      | 15     | 60     | 37             | 18.3             | CE                 |
| 28               | 25      | 15     | 60     | 37             | 18.3             | CE                 |
| 29               | 25      | 15     | 60     | 37             | 18.3             | CE                 |
| 30               | 25      | 15     | 60     | 37             | 18.3             | CE                 |
| 31               | 28      | 16     | 65     | 34             | 16               | CE                 |
| 32               | 28      | 16     | 65     | 34             | 16               | CE                 |
| 33               | 28      | 16     | 65     | 34             | 16               | CE                 |
| 34               | 28      | 16     | 65     | 34             | 16               | CE                 |
| 35               | 58      | 18     | 80     | 42             | 19.4             | CE                 |
| 36               | 58      | 18     | 80     | 42             | 19.4             | CE                 |
| 37               | 58      | 18     | 80     | 42             | 19.4             | CE                 |
| 38               | 58      | 18     | 80     | 42             | 19.4             | CE                 |
| 39               | 58      | 18     | 80     | 42             | 19.4             | CE                 |
| 40               | 58      | 18     | 80     | 42             | 19.4             | CE                 |
| 41               | 58      | 18     | 80     | 42             | 19.4             | CE                 |

|     |    |    |    |    |      |    |
|-----|----|----|----|----|------|----|
| 42  | 58 | 18 | 80 | 42 | 19.4 | CE |
| 43  | 58 | 18 | 80 | 42 | 19.4 | CE |
| 44  | 58 | 18 | 80 | 42 | 19.4 | CE |
| 45  | 58 | 18 | 80 | 42 | 19.4 | CE |
| 46  | 58 | 18 | 80 | 42 | 19.4 | CE |
| 47  | 58 | 18 | 80 | 42 | 19.4 | CE |
| 48  | 58 | 18 | 80 | 42 | 19.4 | CE |
| 49  | 58 | 18 | 80 | 42 | 19.4 | CE |
| 99  | 15 | 10 | 40 | 31 | 17.1 | CE |
| 100 | 15 | 10 | 40 | 31 | 17.1 | CE |
| 101 | 15 | 10 | 40 | 31 | 17.1 | CE |
| 102 | 15 | 10 | 40 | 31 | 17.1 | CE |
| 103 | 15 | 10 | 40 | 31 | 17.1 | CE |
| 104 | 15 | 10 | 40 | 31 | 17.1 | CE |
| 105 | 15 | 10 | 40 | 31 | 17.1 | CE |
| 106 | 15 | 10 | 40 | 31 | 17.1 | CE |
| 107 | 15 | 10 | 40 | 31 | 17.1 | CE |
| 108 | 15 | 10 | 40 | 31 | 17.1 | CE |
| 109 | 15 | 10 | 40 | 31 | 17.1 | CE |
| 110 | 15 | 10 | 40 | 31 | 17.1 | CE |
| 111 | 15 | 10 | 40 | 31 | 17.1 | CE |
| 112 | 15 | 10 | 40 | 31 | 17.1 | CE |
| 113 | 15 | 10 | 40 | 31 | 17.1 | CE |
| 114 | 25 | 15 | 60 | 37 | 18.3 | CE |
| 115 | 25 | 15 | 60 | 37 | 18.3 | CE |
| 116 | 25 | 15 | 60 | 37 | 18.3 | CE |
| 117 | 25 | 15 | 60 | 37 | 18.3 | CE |
| 118 | 25 | 15 | 60 | 37 | 18.3 | CE |
| 119 | 25 | 15 | 60 | 37 | 18.3 | CE |
| 120 | 25 | 15 | 60 | 37 | 18.3 | CE |
| 121 | 25 | 15 | 60 | 37 | 18.3 | CE |
| 122 | 25 | 15 | 60 | 37 | 18.3 | CE |
| 123 | 25 | 15 | 60 | 37 | 18.3 | CE |
| 124 | 25 | 15 | 60 | 37 | 18.3 | CE |
| 125 | 25 | 15 | 60 | 37 | 18.3 | CE |
| 126 | 25 | 15 | 60 | 37 | 18.3 | CE |
| 127 | 25 | 15 | 60 | 37 | 18.3 | CE |
| 128 | 25 | 15 | 60 | 37 | 18.3 | CE |
| 129 | 28 | 16 | 65 | 34 | 16   | CE |
| 130 | 28 | 16 | 65 | 34 | 16   | CE |
| 131 | 28 | 16 | 65 | 34 | 16   | CE |
| 132 | 28 | 16 | 65 | 34 | 16   | CE |
| 133 | 58 | 18 | 80 | 42 | 19.4 | CE |
| 134 | 58 | 18 | 80 | 42 | 19.4 | CE |

|     |    |    |    |    |      |    |
|-----|----|----|----|----|------|----|
| 135 | 58 | 18 | 80 | 42 | 19.4 | CE |
| 136 | 58 | 18 | 80 | 42 | 19.4 | CE |
| 137 | 58 | 18 | 80 | 42 | 19.4 | CE |
| 138 | 58 | 18 | 80 | 42 | 19.4 | CE |
| 139 | 58 | 18 | 80 | 42 | 19.4 | CE |
| 140 | 58 | 18 | 80 | 42 | 19.4 | CE |
| 141 | 58 | 18 | 80 | 42 | 19.4 | CE |
| 142 | 58 | 18 | 80 | 42 | 19.4 | CE |
| 143 | 58 | 18 | 80 | 42 | 19.4 | CE |
| 144 | 58 | 18 | 80 | 42 | 19.4 | CE |
| 145 | 58 | 18 | 80 | 42 | 19.4 | CE |
| 146 | 58 | 18 | 80 | 42 | 19.4 | CE |
| 147 | 58 | 18 | 80 | 42 | 19.4 | CE |
| 197 | 15 | 10 | 40 | 31 | 17.1 | CE |
| 198 | 15 | 10 | 40 | 31 | 17.1 | CE |
| 199 | 15 | 10 | 40 | 31 | 17.1 | CE |
| 200 | 15 | 10 | 40 | 31 | 17.1 | CE |
| 201 | 15 | 10 | 40 | 31 | 17.1 | CE |
| 202 | 15 | 10 | 40 | 31 | 17.1 | CE |
| 203 | 15 | 10 | 40 | 31 | 17.1 | CE |
| 204 | 15 | 10 | 40 | 31 | 17.1 | CE |
| 205 | 15 | 10 | 40 | 31 | 17.1 | CE |
| 206 | 15 | 10 | 40 | 31 | 17.1 | CE |
| 207 | 15 | 10 | 40 | 31 | 17.1 | CE |
| 208 | 15 | 10 | 40 | 31 | 17.1 | CE |
| 209 | 15 | 10 | 40 | 31 | 17.1 | CE |
| 210 | 15 | 10 | 40 | 31 | 17.1 | CE |
| 211 | 15 | 10 | 40 | 31 | 17.1 | CE |
| 212 | 25 | 15 | 60 | 37 | 18.3 | CE |
| 213 | 25 | 15 | 60 | 37 | 18.3 | CE |
| 214 | 25 | 15 | 60 | 37 | 18.3 | CE |
| 215 | 25 | 15 | 60 | 37 | 18.3 | CE |
| 216 | 25 | 15 | 60 | 37 | 18.3 | CE |
| 217 | 25 | 15 | 60 | 37 | 18.3 | CE |
| 218 | 25 | 15 | 60 | 37 | 18.3 | CE |
| 219 | 25 | 15 | 60 | 37 | 18.3 | CE |
| 220 | 25 | 15 | 60 | 37 | 18.3 | CE |
| 221 | 25 | 15 | 60 | 37 | 18.3 | CE |
| 222 | 25 | 15 | 60 | 37 | 18.3 | CE |
| 223 | 25 | 15 | 60 | 37 | 18.3 | CE |
| 224 | 25 | 15 | 60 | 37 | 18.3 | CE |
| 225 | 25 | 15 | 60 | 37 | 18.3 | CE |
| 226 | 25 | 15 | 60 | 37 | 18.3 | CE |
| 227 | 28 | 16 | 65 | 34 | 16   | CE |

|     |    |    |    |    |      |    |
|-----|----|----|----|----|------|----|
| 228 | 28 | 16 | 65 | 34 | 16   | CE |
| 229 | 28 | 16 | 65 | 34 | 16   | CE |
| 230 | 28 | 16 | 65 | 34 | 16   | CE |
| 231 | 58 | 18 | 80 | 42 | 19.4 | CE |
| 232 | 58 | 18 | 80 | 42 | 19.4 | CE |
| 233 | 58 | 18 | 80 | 42 | 19.4 | CE |
| 234 | 58 | 18 | 80 | 42 | 19.4 | CE |
| 235 | 58 | 18 | 80 | 42 | 19.4 | CE |
| 236 | 58 | 18 | 80 | 42 | 19.4 | CE |
| 237 | 58 | 18 | 80 | 42 | 19.4 | CE |
| 238 | 58 | 18 | 80 | 42 | 19.4 | CE |
| 239 | 58 | 18 | 80 | 42 | 19.4 | CE |
| 240 | 58 | 18 | 80 | 42 | 19.4 | CE |
| 241 | 58 | 18 | 80 | 42 | 19.4 | CE |
| 242 | 58 | 18 | 80 | 42 | 19.4 | CE |
| 243 | 58 | 18 | 80 | 42 | 19.4 | CE |
| 244 | 58 | 18 | 80 | 42 | 19.4 | CE |
| 245 | 58 | 18 | 80 | 42 | 19.4 | CE |

|       |         | Steel pipe pile settlement under seismic excitation (mm) |                          |
|-------|---------|----------------------------------------------------------|--------------------------|
| L (m) | PGA (g) | Dry soil condition                                       | Saturated soil condition |
| 4     | 0.1     | 2.9                                                      | 4.2                      |
| 4     | 0.102   | 3                                                        | 4.3                      |
| 4     | 0.34    | 15.5                                                     | 25                       |
| 4     | 0.82    | 35                                                       | 62                       |
| 4     | 0.52    | 22                                                       | 35                       |
| 4     | 0.6     | 26                                                       | 42                       |
| 4     | 0.37    | 18.5                                                     | 27.5                     |
| 4     | 0.326   | 12                                                       | 20                       |
| 4     | 0.65    | 31                                                       | 50.2                     |
| 4     | 0.165   | 3                                                        | 5.2                      |
| 4     | 0.33    | 16                                                       | 25.3                     |
| 4     | 0.438   | 20                                                       | 30.2                     |
| 4     | 0.31    | 11                                                       | 16.2                     |
| 4     | 0.4     | 18                                                       | 25.3                     |
| 4     | 0.104   | 3                                                        | 4                        |
| 4     | 0.1     | 2                                                        | 4                        |
| 4     | 0.102   | 2                                                        | 4.3                      |
| 4     | 0.34    | 12.2                                                     | 21.3                     |
| 4     | 0.82    | 32                                                       | 55.2                     |
| 4     | 0.52    | 19                                                       | 29.6                     |
| 4     | 0.6     | 22                                                       | 40                       |
| 4     | 0.37    | 17                                                       | 25                       |
| 4     | 0.326   | 11                                                       | 17.6                     |
| 4     | 0.65    | 27                                                       | 46                       |
| 4     | 0.165   | 2                                                        | 4.5                      |
| 4     | 0.33    | 14                                                       | 24.64                    |
| 4     | 0.438   | 17                                                       | 27                       |
| 4     | 0.31    | 10                                                       | 15                       |
| 4     | 0.4     | 15                                                       | 23                       |
| 4     | 0.104   | 2                                                        | 4                        |
| 4     | 0.1     | 2                                                        | 3                        |
| 4     | 0.102   | 2                                                        | 3.2                      |
| 4     | 0.34    | 11                                                       | 19                       |
| 4     | 0.82    | 30                                                       | 53                       |
| 4     | 0.1     | 1                                                        | 2.2                      |
| 4     | 0.102   | 1.2                                                      | 2.6                      |
| 4     | 0.34    | 7                                                        | 16                       |
| 4     | 0.82    | 25                                                       | 42                       |
| 4     | 0.52    | 11                                                       | 19                       |
| 4     | 0.6     | 14                                                       | 25                       |
| 4     | 0.37    | 10                                                       | 16                       |

|    |       |       |        |
|----|-------|-------|--------|
| 4  | 0.326 | 6     | 12     |
| 4  | 0.65  | 16    | 28     |
| 4  | 0.165 | 1.3   | 4      |
| 4  | 0.33  | 8.2   | 15     |
| 4  | 0.438 | 10    | 17     |
| 4  | 0.31  | 6     | 10.5   |
| 4  | 0.4   | 9.3   | 15     |
| 4  | 0.104 | 1.1   | 3.2    |
| 14 | 0.1   | 7.3   | 10     |
| 14 | 0.102 | 7.6   | 9.6    |
| 14 | 0.34  | 40    | 62     |
| 14 | 0.82  | 89    | 155    |
| 14 | 0.52  | 55    | 86     |
| 14 | 0.6   | 67    | 115    |
| 14 | 0.37  | 49    | 72     |
| 14 | 0.326 | 32    | 50     |
| 14 | 0.65  | 79    | 129    |
| 14 | 0.165 | 8.2   | 13     |
| 14 | 0.33  | 42    | 70     |
| 14 | 0.438 | 50    | 78     |
| 14 | 0.31  | 29    | 44     |
| 14 | 0.4   | 45    | 66     |
| 14 | 0.104 | 8     | 9.8    |
| 14 | 0.1   | 6.1   | 7.8    |
| 14 | 0.102 | 6.5   | 7.9    |
| 14 | 0.34  | 32    | 55     |
| 14 | 0.82  | 81    | 142    |
| 14 | 0.52  | 48.4  | 75.68  |
| 14 | 0.6   | 58.96 | 101.2  |
| 14 | 0.37  | 43.12 | 63.36  |
| 14 | 0.326 | 28.16 | 44     |
| 14 | 0.65  | 69.52 | 113.52 |
| 14 | 0.165 | 7.22  | 11.44  |
| 14 | 0.33  | 36.96 | 61.6   |
| 14 | 0.438 | 44    | 68.64  |
| 14 | 0.31  | 25.52 | 38.72  |
| 14 | 0.4   | 39.6  | 58.08  |
| 14 | 0.104 | 7.04  | 8.6    |
| 14 | 0.1   | 5     | 6.1    |
| 14 | 0.102 | 5.25  | 6.65   |
| 14 | 0.34  | 28    | 49     |
| 14 | 0.82  | 77    | 133    |
| 14 | 0.1   | 3.8   | 4.88   |
| 14 | 0.102 | 4     | 4.9    |

|    |       |       |       |
|----|-------|-------|-------|
| 14 | 0.34  | 19    | 38.5  |
| 14 | 0.82  | 65    | 115   |
| 14 | 0.52  | 29.04 | 45.4  |
| 14 | 0.6   | 35.4  | 60.72 |
| 14 | 0.37  | 25.6  | 38.1  |
| 14 | 0.326 | 16.88 | 26.4  |
| 14 | 0.65  | 41.7  | 68.12 |
| 14 | 0.165 | 4.32  | 6.9   |
| 14 | 0.33  | 22.2  | 36.96 |
| 14 | 0.438 | 26.4  | 41.2  |
| 14 | 0.31  | 15.3  | 23.23 |
| 14 | 0.4   | 23.76 | 34.8  |
| 14 | 0.104 | 4.23  | 5.2   |
| 27 | 0.1   | 12.6  | 18    |
| 27 | 0.102 | 13    | 17    |
| 27 | 0.34  | 66    | 110   |
| 27 | 0.82  | 150   | 269   |
| 27 | 0.52  | 90    | 150   |
| 27 | 0.6   | 116   | 200   |
| 27 | 0.37  | 85    | 125   |
| 27 | 0.326 | 55    | 88    |
| 27 | 0.65  | 134   | 221   |
| 27 | 0.165 | 14    | 23    |
| 27 | 0.33  | 72.3  | 121   |
| 27 | 0.438 | 86    | 135   |
| 27 | 0.31  | 50    | 76    |
| 27 | 0.4   | 77    | 113   |
| 27 | 0.104 | 14    | 17    |
| 27 | 0.1   | 10    | 15    |
| 27 | 0.102 | 11    | 15    |
| 27 | 0.34  | 55    | 95    |
| 27 | 0.82  | 138   | 246   |
| 27 | 0.52  | 83    | 133   |
| 27 | 0.6   | 101   | 175   |
| 27 | 0.37  | 74    | 110   |
| 27 | 0.326 | 48    | 75    |
| 27 | 0.65  | 119   | 195   |
| 27 | 0.165 | 13    | 19.9  |
| 27 | 0.33  | 63    | 105   |
| 27 | 0.438 | 75    | 120   |
| 27 | 0.31  | 43    | 66    |
| 27 | 0.4   | 66    | 100   |
| 27 | 0.104 | 12    | 15    |
| 27 | 0.1   | 8.6   | 11    |

|    |       |     |     |
|----|-------|-----|-----|
| 27 | 0.102 | 9   | 12  |
| 27 | 0.34  | 48  | 85  |
| 27 | 0.82  | 132 | 229 |
| 27 | 0.1   | 6.5 | 9   |
| 27 | 0.102 | 7   | 9   |
| 27 | 0.34  | 33  | 67  |
| 27 | 0.82  | 110 | 200 |
| 27 | 0.52  | 49  | 78  |
| 27 | 0.6   | 61  | 104 |
| 27 | 0.37  | 44  | 66  |
| 27 | 0.326 | 29  | 45  |
| 27 | 0.65  | 71  | 117 |
| 27 | 0.165 | 8   | 12  |
| 27 | 0.33  | 39  | 64  |
| 27 | 0.438 | 45  | 71  |
| 27 | 0.31  | 26  | 40  |
| 27 | 0.4   | 41  | 60  |
| 27 | 0.104 | 7   | 9   |



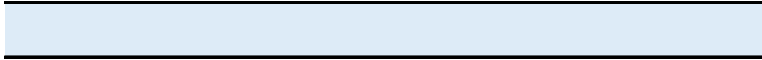

|                                                       |
|-------------------------------------------------------|
| <b>Abbreviations</b>                                  |
| (N1)60 = The equivalent SPT blow count for clean sand |
| PGA (g) = peak ground acceleration                    |
| Dr (%) = soil relative density                        |
| CE = Closed end pile                                  |
| OE = Open end pile                                    |
| Pile dimensions: D(out)=0.91, D(inner)=0.805m         |
